1 Developmental PCB exposure disrupts synaptic transmission and connectivity in the rat  
2 auditory cortex, independent of its effects on peripheral hearing threshold.

3

4 Abbreviated Title: Developmental PCB exposure and the auditory cortex

5

6 Authors: Christopher M. Lee<sup>1</sup>, Renee N. Sadowski<sup>1</sup>, Susan L. Schantz<sup>1,3</sup>, Daniel A. Llano<sup>1,2</sup>

7

8 Affiliations: <sup>1</sup>Beckman Institute, and <sup>2</sup>Department of Molecular and Integrative Physiology,  
9 University of Illinois at Urbana-Champaign, Urbana, IL 61801; <sup>3</sup>Department of Comparative  
10 Biosciences, College of Veterinary Medicine, University of Illinois at Urbana-Champaign,  
11 Urbana, IL 61802

12 Corresponding Author: Daniel A. Llano, 2355 Beckman Institute, 405 N Mathews Ave, Urbana, IL  
13 61801, [d-llano@illinois.edu](mailto:d-llano@illinois.edu)

14 Acknowledgements: This work was supported by the National Institute of Environmental Health  
15 Sciences (NIEHS-R01 ES015687 to S.L.S., NIEHS-T32 ES007326 to C.M.L.), a Beckman Institute  
16 Postdoctoral Fellowship (R.N.S.) and funding from the University of Illinois Research Board. We  
17 thank Alex Asilador for assistance with speaker calibration, and Mindy Howe for help with  
18 dosing and breeding.

19 Conflict of Interests: The authors declare no competing financial interests.

20 Abstract

21 Polychlorinated biphenyls (PCBs) are enduring environmental toxicants and exposure is  
22 associated with neurodevelopmental deficits. The auditory system appears particularly  
23 sensitive, as previous work has shown that developmental PCB exposure causes both hearing  
24 loss and gross disruptions in the organization of the rat auditory cortex. However, the  
25 mechanisms underlying PCB-induced changes are not known, nor is it known if the central  
26 effects of PCBs are a consequence of peripheral hearing loss. Here, we study changes in both  
27 peripheral and central auditory function in rats with developmental PCB exposure using a  
28 combination of optical and electrophysiological approaches. Female rats were exposed to an  
29 environmental PCB mixture in utero and until weaning. At adulthood, auditory brainstem  
30 responses were measured, and synaptic currents were recorded in slices from auditory cortex  
31 layer 2/3 neurons. Spontaneous and miniature inhibitory postsynaptic currents (IPSCs) were  
32 more frequent in PCB-exposed rats compared to controls and the normal relationship between  
33 IPSC parameters and peripheral hearing was eliminated in PCB-exposed rats. No changes in  
34 spontaneous EPSCs were found. Conversely, when synaptic currents were evoked by laser  
35 photostimulation of caged-glutamate, PCB exposure did not affect evoked inhibitory  
36 transmission, but increased the total excitatory charge, the number and distance of sites that  
37 evoke a significant response. Together, these findings indicate that early developmental  
38 exposure to PCBs causes long-lasting changes in both inhibitory and excitatory  
39 neurotransmission in the auditory cortex that are independent of peripheral hearing changes,  
40 suggesting the effects are due to the direct impact of PCBs on the developing auditory cortex.

41

## 42 Significance Statement

43           The mechanisms by which developmental exposure to polychlorinated biphenyls (PCBs)  
44 disrupt the central nervous system are not yet known. Here we show that developmental PCB  
45 exposure is associated with long-lasting dysregulation of both excitatory and inhibitory  
46 neurotransmission in the rodent brain. We further find that, unlike controls, synaptic  
47 parameters in the auditory cortex of PCB-exposed rats are independent of peripheral hearing  
48 changes. These data suggest that PCB-related changes in the auditory cortex are independent  
49 of their effects on the auditory periphery and that PCB exposure may disrupt the plastic  
50 mechanisms needed to restore normal processing in the auditory cortex after peripheral  
51 hearing loss.

52

## 53 Introduction

54           Polychlorinated biphenyls (PCBs) are a family of compounds originally manufactured for  
55 many applications, including dielectrics, hydraulic fluids, coolants, and lubricants. PCBs are  
56 composed of a biphenyl molecule with chlorine substitutions at any of the ten positions on the  
57 biphenyl molecule, creating up to 209 possible congeners. The physical properties and  
58 biological effects of PCBs depend on the positions and number of chlorine substitutions.  
59 Although their manufacture in the US was banned in 1978, they persist in the environment, and  
60 bioaccumulate and biomagnify in food chains, especially in aquatic species, due to their  
61 resistance to degradation and their lipophilicity. Additionally, PCBs are transferred to the fetus

62 and infant through the placenta and breast milk (Agency for Toxic Substances and Disease  
63 Registry, 2000; for review: Crinnion, 2011).

64 Humans and rodents exposed to PCBs experience auditory dysfunction, including higher  
65 sound detection thresholds (Goldey et al., 1995; Grandjean et al., 2001; Powers et al., 2006;  
66 Trnovec et al., 2008; Min et al., 2014; Li et al., 2015), loss of outer hair cells (Crofton et al.,  
67 2000), reduced otoacoustic emission amplitudes (Lasky et al., 2002; Powers et al., 2006;  
68 Trnovec et al., 2008), and increased susceptibility to and severity of audiogenic seizures (Poon  
69 et al., 2015; Bandara et al., 2016). Complex auditory behaviors such as precise sound  
70 localization (Lomber and Malhotra, 2007), temporal processing (Threlkeld et al., 2008), and  
71 frequency discrimination of complex stimuli (Znamenskiy and Zador, 2013) require auditory  
72 cortical processing in mammals. Developmental exposure to PCBs alters the physiology of the  
73 auditory cortex, including delayed auditory P300 latencies (Vreugdenhil et al., 2004), disrupted  
74 tonotopic organization of receptive fields (Kenet et al., 2007), and increased sensitivity to GABA  
75 blockade (Sadowski et al., 2016). However, the synaptic mechanisms underlying these changes  
76 are not known. In addition, it is unclear to what degree these changes are due to direct actions  
77 of PCBs in the brain, or whether these changes are secondary effects of peripheral hearing loss.

78 Hearing loss, when experimentally induced by high level sound exposure, cochlear  
79 ablation, or administration of an ototoxic agent, drives plasticity in central auditory structures,  
80 weakening inhibitory connections, strengthening excitatory connections, and increasing  
81 excitability and spontaneous firing, and these changes generally occur over the course of weeks  
82 (Bledsoe et al., 1995; Wang et al., 2002; Vale and Sanes, 2002; Kotak et al., 2005; Sarro et al.,  
83 2008; Yang et al., 2012; Chambers et al., 2016; Balaram et al. 2019). These changes effectively

84 increase the gain of the central auditory system and may serve a homeostatic role in restoring  
85 central auditory processing after a loss of sensory input (Noreña, 2011; Zeng, 2013; Chambers  
86 et al., 2016). Because PCB exposure elevates hearing thresholds, the central auditory system  
87 might be expected to respond by reducing inhibition and increasing gain in central structures.  
88 Consistent with these predictions, PCB exposure reduces expression of GAD65 in the inferior  
89 colliculus (Bandara et al., 2016). However, in the cortex, GAD65 levels are unaffected and  
90 thalamocortical transmission is more vulnerable to GABA antagonism in PCB-exposed rats,  
91 suggesting PCB treatment is associated with paradoxically higher background levels of cortical  
92 inhibition (Bandara et al., 2016; Sadowski et al., 2016).

93         Synapses in the supragranular layers of the auditory cortex connect neural circuits  
94 responsible for a wide range of auditory processes, including cross-frequency integration,  
95 sensory gain, coincidence detection, and cross-modality integration (Winkowski and Kanold,  
96 2013; Kato et al., 2015; Jiang et al., 2015; Meng et al., 2017). Therefore, it is important to  
97 examine whether PCB exposure affects synaptic connectivity and transmission, as changes  
98 could point to underlying causes of complex auditory deficits. Layer 2/3 neurons receive  
99 thalamic input, and cortical inputs from all layers, but are more likely to be connected to nearby  
100 inputs from layers 2-4 (Oviedo et al., 2010; Atencio and Schreiner, 2010).

101         To determine the effects of developmental PCB exposure on cortical synaptic  
102 transmission, and whether these changes are related to peripheral hearing loss, we dosed rats  
103 with either a 6 mg/kg/day PCB oil mixture or a control oil mixture beginning four weeks before  
104 breeding and continuing until weaning. Because the properties of PCBs vary among congeners,  
105 we studied the effects of an environmentally relevant PCB congener mixture. Experimental

106 subjects were treated with a PCB mixture that mimics the congener profile found in the Fox  
107 River in Wisconsin (Kostyniak et al., 2005). From adult offspring, we recorded auditory  
108 brainstem responses, and excitatory and inhibitory synaptic currents from layer 2/3 auditory  
109 cortical neurons, either in the absence of stimulation (spontaneous and miniature currents), or  
110 during laser photostimulation of caged glutamate (evoked currents).

111

112 Methods

113 PCB exposure and breeding

114 All procedures were approved by our university Institutional Animal Care and Use  
115 Committee. Rats were maintained in facilities accredited by the Association for the Assessment  
116 and Accreditation of Laboratory Animal Care. All animal handling and data collection were  
117 performed by experimenters blinded to treatment group. Experimental design and dosing and  
118 breeding time courses are summarized in Figure 1. Long-Evans rats, 8-10 weeks of age and of  
119 both sexes, were purchased from Envigo, and individually housed in standard polycarbonate  
120 cages with woodchip bedding. All rats were fed rat chow (Envigo Teklad rodent diet 8604) and  
121 water ad libitum. Females were randomly assigned to control or experimental treatments.  
122 Beginning one week after receiving the rats, experimental subjects were orally dosed with a  
123 PCB mixture in a corn oil vehicle (6 mg/kg/day PCB mixture) and control subjects were orally  
124 dosed with corn oil alone (0 mg/kg/day PCB mixture). Dosing was accomplished by pipetting the  
125 PCB mixture or oil (0.4 mL/kg) onto one half of a vanilla wafer cookie (Keebler Golden Vanilla  
126 Wafers), which were fed to the rats each day. The PCB mixture (35% Aroclor 1242, 35% Aroclor

127 1248, 15% Aroclor 1254, 15% Aroclor 1260) was synthesized to mimic the congener profile  
128 found in the walleye fish from the Fox River in Wisconsin (Kostyniak et al., 2005). Experimental  
129 rats were dosed at 6 mg/kg/day, as developmental exposure at this concentration is ototoxic,  
130 and increases audiogenic seizure incidence and severity, but does not produce overt signs of  
131 clinical toxicity (Kostyniak et al., 2005; Powers et al., 2006, 2009; Bandara et al., 2016). After  
132 four weeks of PCB exposure, each female rat was paired with an untreated male rat in a  
133 hanging wire cage. Upon detection of a sperm plug indicating gestational day 0, females were  
134 removed from males and daily PCB or control dosing continued through gestation and nursing,  
135 until weaning. Litters were standardized to 8 pups two days following birth (PND 2), and pups  
136 were weaned on PND 21. All offspring were housed in pairs or triplets with cagemates of the  
137 same sex and same treatment. All data presented in the current study were collected from  
138 female subjects (PCB: n = 60, control: n = 59).

139 Rats were dosed and bred from 5/13/2015 to 8/9/2015 by RNS and were used to collect  
140 spontaneous and miniature excitatory and inhibitory postsynaptic potentials. A second group of  
141 rats was dosed and bred from 10/10/2016 to 1/4/2017 by CML and was used to collect input  
142 maps by laser photostimulation. Auditory brainstem responses (ABRs) were collected from all  
143 rats to measure differences in hearing thresholds between treated and control rats.

#### 144 Auditory Brainstem Responses

145 ABRs were collected within one week before electrophysiological recording  
146 experiments. Rats were anesthetized with ketamine (100 mg/kg) and xylazine (3 mg/kg) and  
147 placed in a sound-attenuated chamber. White noise bursts and pure tone pips, both of 5 ms

148 duration, were delivered through an electrostatic speaker (ES1, Tucker Davis Technologies)  
149 placed 2.5 cm from the right ear. ABRs were recorded with two subdermal recording  
150 electrodes, one placed above the vertex of the skull, one placed behind the right pinna, and one  
151 subdermal ground electrode placed at the base of the tail. The electrodes were connected to a  
152 2400A extracellular preamplifier and headstage (Dagan Corporation), or a RA16PA preamplifier  
153 and collected on an RP2.1 real-time processor (Tucker Davis Technologies). Signals were  
154 digitized and averaged across 512 trials, and bandpassed between 50 and 3000 Hz. ABR  
155 thresholds were estimated as the lowest sound level producing a peak in the signal at 3-5 ms  
156 following the sound onset.

## 157 Electrophysiology

158 We investigated synaptic inputs to auditory cortex of both hemispheres with patch  
159 clamp electrophysiology in cortical slices. Rats were anesthetized with ketamine and xylazine,  
160 and transcardially perfused with an ice-cold high-sucrose solution (in mM: 206 sucrose, 26  
161 NaHCO<sub>3</sub>, 11 glucose, 10 MgCl<sub>2</sub>, KCl 2.5, NaH<sub>2</sub>PO<sub>4</sub> 1.25, CaCl<sub>2</sub> 0.50). The brain was quickly  
162 removed and 300 µm thick coronal slices were prepared and allowed to incubate in an  
163 oxygenated incubation solution for 1 hour at 32°C. Slices containing auditory cortex were  
164 identified based on visual comparison to a mouse brain atlas (Paxinos and Franklin, 2004). After  
165 incubation, a slice was transferred to a recording chamber and immersed in an oxygenated  
166 artificial cerebrospinal fluid (aCSF, in mM: 126 NaCl, 26 NaHCO<sub>3</sub>, 10 glucose, 2.5 KCl, 2 CaCl<sub>2</sub>, 2  
167 MgCl<sub>2</sub>, 1.25 NaH<sub>2</sub>PO<sub>4</sub>) at 32°C. Pyramidal neurons in layer 2/3 were visualized under DIC  
168 microscopy, and whole-cell configuration was achieved with borosilicate glass recording  
169 pipettes (pipette resistances of 4-10 MΩ) filled with internal solution (in mM: 117 CsOH, 117



170 gluconic acid, 11 CsCl, 1.0 MgCl<sub>2</sub>, 0.07 CaCl<sub>2</sub>, 10 HEPES, EGTA 0.1, 2.0 Na-ATP, 0.4 Na-GTP; with  
171 pH 7.3). Fig. 3A depicts the location of the recording pipette in an example auditory cortical  
172 slice. Electrophysiological signals were sampled at 20 kHz on a DigiData 1550A A/D converter  
173 (Molecular Devices).

174 While holding the cell in voltage clamp, we recorded spontaneous excitatory and  
175 inhibitory postsynaptic currents (sEPSCs and sIPSCs), and miniature excitatory and inhibitory  
176 postsynaptic currents (mEPSCs and mIPSCs). IPSCs were recorded with bath application of 20  
177  $\mu$ M DNQX and 10  $\mu$ M CPP, while the membrane potential was clamped at 10 mV with a  
178 Multiclamp 700B amplifier. EPSCs were recorded with bath application of 20  $\mu$ M GABAzine  
179 while the membrane potential was clamped at -65 mV. Spontaneous currents were initially  
180 recorded for 15 minutes. Subsequently, 1  $\mu$ M TTX was added to the aCSF, and miniature  
181 postsynaptic currents were recorded for the next 15 minutes. IPSC and EPSC events were  
182 detected and quantified using Minianalysis software. To determine the input resistance of the  
183 membrane, we periodically injected hyperpolarizing voltage pulses (-10 mV, 100 ms, 1 pulse per  
184 20 seconds), and measured the median current response during the first five minutes of  
185 recording.

#### 186 Laser Scanning Photostimulation

187 MNI-caged-L-glutamate (Tocris) releases glutamate with exposure to 300-380 nm light,  
188 allowing for temporally and spatially precise uncaging of glutamate with laser photostimulation.  
189 We produced spatial maps of input strength in coronal slices of auditory cortex, prepared in the  
190 same manner as for spontaneous and miniature postsynaptic currents. To generate input maps,

191 we applied to 150  $\mu$ M MNI-glutamate to the aCSF. UV laser light (355 nm, 100 kHz pulses, DPSS  
192 Lasers) was guided to the slice by optical path mirrors and lenses (Thorlabs, Newport), and s  
193 focused through a 10x objective (Olympus). The beam intensity was attenuated with an  
194 acousto-optical modulator (Gooch and Housego), to deliver 24 mW light at the slice in 1 ms  
195 pulses. At this power, laser photostimulation was observed to drive spikes in neurons within a  
196  $\sim$ 50  $\mu$ m radius around the laser spot center, similar to what has been seen using a similar laser  
197 stimulation configuration in the mouse auditory cortex (Slater et al. 2019)

198 Maps of synaptic input amplitude and charge to layer 2/3 neurons were produced by  
199 laser scanning photostimulation. 50  $\mu$ M QX-314 was added to the internal solution to block  
200 voltage-gated sodium channels, and a neuron from layer 2/3 was patched in whole-cell  
201 configuration and recorded in voltage clamp. In a subset of experiments, two neurons from  
202 layer 2/3 were simultaneously patched and recorded during photostimulation. Using Prairie  
203 View software or ePhus, the slice was serially photostimulated in a 32x32 grid of stimulation  
204 sites, with adjacent grid points separated by a 40  $\mu$ m distance, serving as a lower bound on the  
205 spatial resolution of our analysis. The grid was aligned to the pial surface of the slice, and  
206 oriented along the point on the surface closest to the patched neuron(s). Laser stimulation was  
207 pulsed for 1 ms at each stimulation site, and advanced to the successive stimulation site every  
208 second. The sequence of stimulation sites was arranged in a non-neighbor order. Patched  
209 neurons were recorded in voltage clamp held at -65 mV during the 32x32 photostimulation  
210 sequence to produce maps of excitatory input, then recorded in voltage clamp held at 10 mV  
211 during the photostimulation sequence to produce maps of inhibitory input.

212 Laser Scanning Photostimulation Analysis

213           We measured the charge, amplitude, and latency of the current response to  
214 photostimulation at each site. Current signals recorded during photostimulation were lowpass  
215 filtered at 150 Hz. The baseline current, measured as the median during the 100 ms window  
216 preceding the laser onset, was subtracted from the signal, so that all measures are relative to  
217 the baseline current. All measures were computed from a 200 ms analysis window starting at  
218 the laser onset. Charge was computed by rectifying the current (positive rectification for  
219 inhibitory charge, and negative rectification for excitatory charge), and integrating the rectified  
220 current during 200 ms analysis window. Amplitude was measured as the maximum current for  
221 inhibitory input, and minimum current for excitatory current. Latency was measured as the first  
222 time point of the analysis window in which the current exceeded 10% amplitude. Current  
223 responses qualified as “significant” if their amplitudes exceeded 10 times the standard  
224 deviation of the baseline window current measured during the 100 ms prior to laser onset.

225           Maps of input charge and amplitude were constructed by ordering response charge and  
226 amplitude measures in two-dimensional arrays according to the photostimulation site.  
227 Observed amplitude and charges may include spontaneous currents in the recorded neuron  
228 that coincide with photostimulation. We took two approaches to reduce noise introduced by  
229 photostimulation-independent currents. First, we smoothed amplitude and charge maps by  
230 convolving the maps with a 4x4 gaussian kernel with standard deviation of 0.5. A similar  
231 approach was employed by Kratz and Manis (2015). Second, we included only charges and  
232 amplitudes from sites with significant responses. Thus, group-averaged maps and means were  
233 computed by including only significant sites from smoothed maps.

234           Excitatory responses to glutamate uncaging may arise from two sources. EPSCs may be  
235 driven by either: 1) the binding of photo-uncaged glutamate to ionotropic glutamate receptors  
236 in the recorded cell membrane, considered “direct” responses, or 2) synaptic transmission from  
237 presynaptic neurons driven by uncaged glutamate, considered “synaptic” responses. Synaptic  
238 responses were separated from direct responses on the basis that synaptic response latencies  
239 are later than 7 ms, and direct responses latencies are earlier than 7 ms. Response latencies  
240 were segregated at 7 ms because the distribution of synaptic latencies revealed a local  
241 minimum at 7 ms, indicating two subpopulation of EPSCs. We interpreted the subpopulation  
242 with earlier latencies as direct currents; therefore, we included in our group-averaged  
243 excitatory maps and means, only responses with latencies later than 7 ms, to capture synaptic  
244 responses. Comparable time windows of direct and synaptic responses have been observed by  
245 other studies (Kratz and Manis, 2015; Meng et al., 2017).

#### 246 Statistical Analysis

247           We tested the effect of PCB treatment on hearing thresholds, spontaneous synaptic  
248 current amplitude and frequency, and photostimulation-evoked synaptic current amplitude,  
249 charge, latency, input area, mean input distance, and excitation-inhibition ratios. However,  
250 these responses may vary with changes of age and hearing thresholds. Furthermore, we  
251 typically recorded from multiple neurons from each subject, and sampled multiple subjects  
252 from each litter (spontaneous and miniature currents: 116 neurons, 65 subjects, 24 litters,  
253 photostimulation-evoked currents: 46 neurons, 32 subjects, 26 litters), potentially introducing  
254 litter effects when comparing the responses of individual neurons. To account for response  
255 variance introduced by these factors, we used mixed effects modeling to predict our responses

256 with PCB treatment, age, and noise hearing thresholds as fixed effects and birth litter as a  
257 grouping variable for random effects. For all response variables tested, we did not find a  
258 significant relationship between the response variables and age or hearing threshold. We  
259 report the significance of group comparisons for each response variable, as the probability of  
260 the slope of the response over PCB treatment, against a student's t distribution.

261 Ratios of excitatory to inhibitory charge and amplitude are expressed as a gain in dB, as  
262 the logarithmic transform of the observed ratios approximately follows a gaussian distribution.

$$263 \quad Gain = 10 * \frac{1}{1024} * \sum_{n=1}^{1024} \log_{10} \left( \frac{R_{e,n}}{R_{i,n}} \right)$$

264 Here,  $R_{e,n}$  and  $R_{i,n}$  are the inhibitory and excitatory charge or amplitude response to  
265 photostimulation at site n (total stimulation sites = 1024), respectively.

266 To quantify differences in the spatial profiles of synaptic input, input charge was binned  
267 by stimulation site distance in 80  $\mu\text{m}$  bins. Mean charge within each bin, across all subjects in  
268 each treatment group, was computed. Connection probability was computed as the number of  
269 sites with significant responses within each 80  $\mu\text{m}$  bin, divided by the total number of sites  
270 within that bin.

271

## 272 Results

273 Hearing thresholds are elevated for PCB-exposed subjects

274 Two separate cohorts of rats were exposed to either a PCB mixture (6 mg/kg/day), or a  
275 corn oil vehicle, starting at gestation and continuing until weaning. We recorded ABRs to assess  
276 hearing thresholds during adulthood (110-518 days), and used a mixed-effects model to test  
277 the effect of PCB exposure on hearing threshold, independent of age and litter effects. A  
278 modest but significant hearing loss was seen with developmental PCB exposure, consistent with  
279 previous studies (Powers et al., 2006; Powers et al., 2009). We observed these hearing  
280 threshold differences in both rats used for comparing spontaneous and miniature synaptic  
281 currents (study 1), and those used to compare photostimulation-evoked currents (study 2).  
282 PCB-exposed rats had on average 9.0 dB higher ABR thresholds to white noise bursts relative to  
283 controls in the first study ( $t(33) = 6.86$ ,  $p < 0.001$ ), and 5.8 dB higher thresholds in the second  
284 ( $t(29) = 4.31$ ,  $p < 0.001$ ). ABRs to tone pips revealed that PCB exposure elevated thresholds to 4  
285 kHz and 8 kHz tones in both studies, and elevated thresholds to 16 kHz tones in the second  
286 study (Fig. 2). Therefore, we confirmed that the PCB-exposed subjects in our study had elevated  
287 hearing thresholds, consistent with previous findings.

288

289 Spontaneous and miniature inhibitory postsynaptic currents are more frequent with PCB  
290 exposure

291 We asked whether developmental PCB exposure would change inhibitory and excitatory  
292 synaptic input to the auditory cortex. To answer this question, we patched Layer 2/3 neurons  
293 from coronal slices of the auditory cortex and measured spontaneous excitatory or inhibitory  
294 postsynaptic currents in separate sets of recordings (see Fig. 3 for an example of slice image

295 and spontaneous EPSCs). On average, cortical neurons in PCB-exposed subjects received more  
296 frequent ( $t(38) = 3.83$ ,  $p < 0.001$ ) and larger amplitude ( $t(38) = 2.70$ ,  $p = 0.010$ ) spontaneous  
297 IPSCs for PCB-exposed subjects compared to controls (Fig. 4A). In contrast, no difference was  
298 apparent in the frequency or amplitude of spontaneous EPSCs between the two treatment  
299 groups. To clarify the potential mechanisms of the synaptic changes, we isolated miniature  
300 synaptic currents with bath application of 1  $\mu\text{M}$  TTX. Consistent with our observations of  
301 spontaneous synaptic currents, PCB treatment was associated with higher miniature IPSC  
302 frequency ( $t(28) = 2.66$ ,  $p = 0.013$ ), and not associated with differences in miniature EPSC  
303 frequency or amplitude. However, the amplitude of miniature IPSCs was not different between  
304 treatment groups ( $t(28) = 1.59$ ,  $p = 0.12$ ), suggesting that changes in inhibition with PCB  
305 exposure may be mediated primarily by presynaptic changes. Furthermore, input resistance  
306 was not affected by PCB exposure (PCB exposed:  $188.2 \pm 34.9 \text{ M}\Omega$ , control:  $225.4 \pm 41.7 \text{ M}\Omega$ ,  
307  $t(66) = 1.29$ ,  $p = 0.21$ ), suggesting that the increased spontaneous IPSC amplitudes are  
308 mediated by synaptic mechanisms, rather than changes in the intrinsic membrane properties of  
309 cortical neurons. Together, these data point to an increase of spontaneous inhibitory input to  
310 Layer 2/3 auditory cortex in PCB-exposed subjects.

311 Changes of inhibitory and excitatory input to auditory cortex following peripheral  
312 hearing loss has been well documented (Kotak et al., 2005; Sarro et al., 2008; Balaram et al.  
313 2019). Therefore, changes of inhibition seen in exposed subjects could be a secondary effect of  
314 the hearing threshold differences induced by PCB exposure. Among control subjects, increases  
315 of hearing threshold predicted reductions of sIPSC frequency ( $r = -0.44$ ,  $p = 0.04$ ) and amplitude  
316 ( $r = -0.42$ ,  $p = 0.04$ , Fig. 4B, blue points), and reductions of mIPSC frequency ( $r = -0.58$ ,  $p = 0.01$ ).

317 These data indicate that in control subjects, the auditory system can adjust cortical inhibition to  
318 the hearing sensitivity of the animal. However, this relationship was abolished in PCB-exposed  
319 subjects (sIPSC frequency:  $r = 0.15$ ,  $p = 0.55$ , amplitude:  $r = -0.13$ ,  $p = 0.59$ , mIPSC frequency:  $r =$   
320  $-0.02$ ,  $p = 0.94$ , mIPSC amplitude:  $r = -0.03$ ,  $p = 0.92$ ), suggesting that the PCB-induced increases  
321 in cortical inhibition are not caused by peripheral hearing loss. In contrast to the relationship of  
322 hearing thresholds and synaptic inhibition, hearing thresholds did not correlate with sEPSC  
323 frequency in either control or PCB-exposed rats (control:  $r = 0.007$ ,  $p = 0.97$  PCB:  $r = 0.10$ ,  $p =$   
324  $0.55$ ), amplitude (control:  $r = -0.03$ ,  $p = 0.84$ , PCB:  $r = 0.22$ ,  $p = 0.21$ ), or mEPSC frequency  
325 (control:  $r = 0.29$ ,  $p = 0.11$  PCB:  $r = -0.21$ ,  $p = 0.21$ ) or amplitude (control:  $r = -0.052$ ,  $p = 0.79$   
326 PCB:  $r = 0.17$ ,  $p = 0.39$ ).

327

328 Laser scanning photostimulation reveals maps of synaptic input to Layer 2/3 auditory cortical  
329 neurons

330 Laser scanning photostimulation of caged glutamate (LSPS) allows spatially and  
331 temporally precise stimulation of the slice. By using LSPS during recordings of photostimulation-  
332 evoked synaptic currents, spatial maps of synaptic strength can be generated (Fig. 5B, C). To  
333 further elucidate changes in auditory cortical connectivity associated with PCB exposure, we  
334 examined the spatial profiles of synaptic input to layer 2/3 auditory cortex in exposed and  
335 control subjects. Fig. 6 summarizes the spatial maps produced with LSPS. Here we align all  
336 spatial maps to the recorded neuron, with the pial surface in the positive y direction, and  
337 dorsomedial in the positive x direction. Significant responses from stimulation site with the



338 same positions relative to the recorded neuron are averaged across all neurons from each  
339 treatment group, and the averaged responses from each relative position are combined to  
340 produce the spatial maps. In excitatory maps, responses with a latency < 7ms are excluded, to  
341 minimize the influence of direct responses to glutamate.

342         Among maps from control subjects, the strongest excitatory input (depicted in red pixels  
343 in Fig. 6) is on average near or superficial to the recorded neuron, with minimal excitatory input  
344 (depicted in dark blue pixels) from any point more than 400  $\mu\text{m}$  distance from the recorded cell.  
345 In maps from PCB-exposed subjects, the strongest excitatory input is also near or superficial to  
346 the recorded neuron, with moderate input (light blue to cyan pixels) spanning most of the  
347 photostimulation map. Inhibitory maps for both control and PCB-exposed subjects were similar  
348 in shape. The strongest inhibitory input was near the recorded neuron, and average inhibitory  
349 strength drops off rapidly with increasing distance.

350

351 PCB-exposed cells receive more total excitatory input charge, and more distant excitatory  
352 inputs

353         We estimated the total synaptic input for each recorded cell by summing the amplitudes  
354 and charges evoked from all stimulation sites that yielded a significant response (Fig. 7A-B, first  
355 two columns). Cells from control subjects received  $0.12 \pm 0.03$  nC of total excitatory charge and  
356  $2.07 \pm 0.72$  nC of total inhibitory charge. Cells from PCB-exposed subjects received  $0.31 \pm 0.10$   
357 nC of total excitatory charge and  $2.10 \pm 1.10$  nC of total inhibitory charge. PCB exposure was  
358 associated with a significant increase in excitatory charge ( $t(39) = 2.26$ ,  $p = 0.030$ ), but no

359 change in inhibitory charge ( $t(39) = 0.029$ ,  $p = 0.98$ ). However, the total of photostimulation-  
360 evoked excitatory and inhibitory current amplitudes were not different between control  
361 (excitation:  $0.59 \pm 0.20$  nA, inhibition:  $6.40 \pm 2.22$  nA) and PCB-exposed groups (excitation:  $1.09$   
362  $\pm 0.36$  nA, inhibition:  $5.09 \pm 2.28$  nA, comparison of excitation:  $t(39) = 1.52$ ,  $p = 0.14$ , inhibition:  
363  $t(39) = 0.28$ ,  $p = 0.78$ ). The ratio of excitation to inhibition was not significantly different  
364 between treatments (Charge E/I, control:  $-2.1 \pm 1.8$  dB, PCB-exposed:  $-3.6 \pm 1.2$  dB,  $t(30) = 0.56$ ,  
365  $p = 0.58$ ; Amplitude E/I, control:  $-0.7 \pm 1.7$  dB, PCB-exposed:  $-2.2 \pm 0.9$  dB,  $t(30) = 0.52$ ,  $p =$   
366  $0.61$ ). In addition, latency was not affected by PCB treatment (excitatory latencies, control:  $17.2$   
367  $\pm 6.4$  ms PCB:  $17.2 \pm 9.7$  ms,  $t(37) = 0.31$ ,  $p = 0.76$ , inhibitory latencies, control:  $12.4 \pm 7.2$  ms,  
368 PCB:  $12.3 \pm 5.9$  ms,  $t(38) = 0.62$ ,  $p = 0.54$ ). In summary, relative to controls, PCB-exposed cells  
369 responded to the excitatory inputs evoked by photostimulation with greater charge, but similar  
370 amplitude, and responded similarly to inhibitory inputs.

371 The difference in total excitatory charge between PCB-exposed and control subjects  
372 may be due to a change in the number of input sites, or the strength of each input site. We  
373 observed that cells from PCB-exposed subjects received significant excitatory input from more  
374 sites than cells from controls (control:  $17.9 \pm 6.0$  sites, PCB-exposed:  $33.8 \pm 9.3$  sites,  $p = 0.048$ ).  
375 On the other hand, the average charge per site was not significantly different between  
376 treatments (control:  $7.2 \pm 1.3$  pA, PCB-exposed:  $9.0 \pm 1.9$  pA,  $t(39) = 0.35$ ,  $p = 0.72$ ). Thus,  
377 cortical neurons from PCB-exposed rats receive input from a greater number of sites than  
378 controls but receive input of the same strength from each site.

379 The spatial profile of input strength is plotted as a function of stimulation site distance  
380 in Fig. 8. Differences in excitatory input response charge, and excitatory input site number are

381 most pronounced between ~100 and 700  $\mu\text{m}$  distance. Furthermore, the average distance of  
382 significant excitatory stimulation sites is longer in the PCB-exposed group compared to controls  
383 (control:  $215 \pm 25.8 \mu\text{m}$ , PCB-exposed:  $284 \pm 25.3 \mu\text{m}$ ,  $t(39) = 2.23$ ,  $p = 0.032$ ). In contrast, the  
384 average distance of significant inhibitory stimulation sites is not different between the groups  
385 (control:  $239 \pm 32 \mu\text{m}$ , PCB:  $239 \pm 29 \mu\text{m}$ ,  $t(38) = 0.16$ ,  $p = 0.87$ ). Distances were clustered into  
386 layers based on contrast seen on DIC images, and no differences were seen between groups  
387 (not shown). Together, these findings suggest that in PCB-exposed subjects, Layer 2/3 auditory  
388 cortical neurons integrate excitatory input from a greater number of neurons at intermediate  
389 (100-700  $\mu\text{m}$ ) distances, without affecting inhibitory connections.

390

## 391 Discussion

392 Developmental PCB exposure induces long-lasting increases in spontaneous inhibitory tone and  
393 increases in excitatory connectivity in auditory cortex

394 We found that developmental PCB exposure results in paradoxically increased  
395 spontaneous IPSC amplitude and frequency and increased miniature IPSC frequency in layer 2/3  
396 of the auditory cortex (Fig. 4A), while also inducing peripheral hearing loss. The increased  
397 inhibition appears to be mediated by presynaptic changes, as the amplitude of miniature IPSCs  
398 is unchanged with PCB treatment. In contrast, PCB treatment did not affect photostimulation-  
399 evoked IPSCs. Therefore, PCB exposure may induce changes that specifically affect spontaneous  
400 release of GABA from inhibitory cortical neurons, without affecting the strength of evoked  
401 inhibitory synaptic transmission. While evoked synaptic currents depend on synaptic density

402 and efficacy of each synapse, spontaneous synaptic transmission reflects synaptic efficacy and  
403 rate of vesicle release. Therefore, PCB exposure may increase vesicle release of inhibitory  
404 inputs. Vesicle release can be modified by a variety of changes, including changes of activity,  
405 membrane potential, intracellular calcium dynamics, and the readily releasable pool. Increases  
406 of spontaneous inhibition following developmental PCB exposure are consistent with previous  
407 findings that thalamocortical transmission is more strongly enhanced by GABA<sub>A</sub>-receptor  
408 blockade in PCB-exposed subjects (Sadowski et al., 2016). Because PCB exposure increases  
409 spontaneous inhibitory input to auditory cortical neurons, release from inhibition with GABA<sub>A</sub>-  
410 receptor antagonist application is more pronounced in PCB-exposed subjects compared to  
411 controls.

412 It is important to note that rats used to study photostimulation-evoked currents had  
413 unexpectedly higher white noise thresholds and lower pure tone thresholds than those used to  
414 study spontaneous and miniature currents ( $t(106) = 6.84$ ,  $p < 0.001$ ). The reasons for these  
415 differences are not known, but may include: 1) evaluation of ABR thresholds by different  
416 experimenters, 2) different headstage and preamplifiers used between studies (study 1: Dagan  
417 2400A, study 2: TDT RA4LI/RA4PA), or 3) true hearing threshold differences between the  
418 different cohorts of rats, purchased approximately two years apart. Nonetheless, PCB exposed  
419 rats showed significantly higher noise, 4 kHz tone, and 8 kHz tone thresholds in each study.

420 Developmental PCB exposure does not affect the frequency and amplitude of  
421 spontaneous or miniature EPSCs (Fig. 4A), suggesting that synaptic transmission of individual  
422 synapses and spontaneous excitatory input do not change with PCB exposure. However, in  
423 neurons from PCB-exposed subjects, EPSCs were evoked from a larger number of

424 photostimulation sites, and they were evoked from more distant sites on average (Fig. 7A).  
425 Thus, rather than changing the strength of individual synapses, PCB exposure results in  
426 abnormally enhanced connectivity between excitatory cortical neurons, with the largest  
427 changes at distances of 100-700  $\mu\text{m}$  (Fig. 8). Because Layer 2/3 cortical neurons integrate input  
428 from neurons with different frequency tuning, PCB-induced changes in excitatory connectivity  
429 may disrupt frequency receptive fields in auditory cortex (Kenet et al., 2006). Together, these  
430 changes suggest that PCB exposure may degrade spectral resolution as a result of excessive  
431 excitatory connectivity in the cortex.

432         Among the control subjects, higher ABR thresholds are associated with reduced cortical  
433 inhibition, which may reflect a compensatory increase of gain in the central auditory system  
434 (Fig. 4B). However, with PCB exposure, inhibition is not related to hearing threshold. Therefore,  
435 PCB exposure may disrupt the compensatory regulation of cortical activity by modulation of  
436 central auditory gain seen in unexposed subjects. Furthermore, PCB exposure increases  
437 spontaneous inhibitory input in the cortex, while elevating hearing thresholds. Thus, while PCB  
438 exposure impairs hearing, its effects on spontaneous inhibition would paradoxically further  
439 reduce activity in the auditory cortex, potentially compounding auditory perceptual deficits.

440

441 Potential mechanisms of changes

442         Increases of spontaneous IPSC amplitude and frequency seen in PCB-exposed subjects  
443 were unexpected and contrast previous findings of reduced central inhibition following hearing  
444 loss (Bledsoe et al., 1995; Vale and Sanes, 2002; Kotak et al., 2005; Sarro et al., 2008; Balaram

445 et al., 2019). Several differences between PCB-induced hearing loss and aforementioned  
446 studies may explain differences in the outcomes. First, the hearing impairment following PCB  
447 exposure is relatively mild, elevating thresholds by less than 10 dB on average as observed in  
448 the current study and in previous studies (Powers et al., 2006; Powers et al., 2009). Exposure to  
449 PCBs leads to a loss of outer hair cells and reduced otoacoustic emissions (Goldey et al., 2000;  
450 Lasky et al., 2002; Powers et al., 2006; Trnovec et al., 2008). Inner hair cells, on the other hand,  
451 are spared after exposure to a commercial PCB mixture (Aroclor 1254, Goldey et al., 2000), but  
452 it is not yet known if they are affected by the Fox River PCB mixture. PCBs and other dioxin-like  
453 compounds reduce thyroid hormone levels, and this thyroid hormone deficiency may be  
454 involved in PCB-induced hearing loss, as thyroxine replacement partially restores hearing in  
455 PCB-exposed animals (Goldey et al., 1995, 1998; Poon et al., 2011). Furthermore,  
456 developmental hypothyroidism can affect the development, connectivity, and organization of  
457 auditory cortical neurons (Ruiz-Marcos et al., 1983; Berbel et al., 1993; Lucio et al., 1997). In  
458 contrast, studies documenting increases of central auditory gain following hearing loss typically  
459 involve damage to inner hair cells and threshold increases of 30 dB or more. Therefore, PCB-  
460 induced hearing loss may involve specific mechanisms not typically seen with peripheral  
461 hearing loss, that result in increased cortical inhibition.

462         Second, in addition to damaging the sensory epithelium, PCBs also have direct actions in  
463 the central nervous system. The Fox River PCB mixture used in this study was previously found  
464 to increase binding of ryanodine to ryanodine receptors (RyRs, Kostyniak et al., 2005).  
465 Ryanodine receptor activation can induce growth of dendrites, and RyR-dependent increases in  
466 dendritic growth have been observed following developmental exposure to PCBs (Lein et al.,

467 2007; Yang et al, 2009). Furthermore, developmental PCB exposure disrupts both experience-  
468 dependent synaptic plasticity and Morris water maze learning, supporting the idea that the  
469 activation of RyRs may underlie some of the behavioral effects of PCBs (Yang et al., 2009). PCB  
470 exposure not only affects dendritic growth, but also alters excitatory and inhibitory synaptic  
471 transmission in auditory cortex and hippocampus (Kenet et al., 2007; Kim et al., 2009). In  
472 hippocampal slices, changes in synaptic transmission following wash-in of PCBs were found to  
473 be dependent on RyR activation (Kim et al., 2009). We observed an increase in the number of  
474 sites producing significant excitatory synaptic responses to laser photostimulation (Fig. 7A, 8).  
475 This change may be explained by increased synaptic connectivity between excitatory cortical  
476 neurons due to higher levels of RyR activation in PCB-exposed subjects.

477 In summary, we find that developmental exposure to PCBs increases spontaneous  
478 inhibitory input to the neurons in layer 2/3 of the auditory cortex, increases the number of  
479 excitatory connections, and disrupts the relationship between inhibition and hearing  
480 impairment. These changes were unexpected as the auditory system typically responds to  
481 hearing loss by increasing gain in central auditory structures. Thus, in addition to elevating  
482 hearing thresholds, PCB exposure may disrupt plastic changes needed to restore central  
483 auditory function after hearing loss by increasing spontaneous cortical inhibition. Thus, the  
484 cognitive deficits associated with PCB exposure in humans (Vreugdenhil et al., 2002; Schantz et  
485 al., 2003; Newman et al., 2006), may be related to long-lasting changes in the underlying  
486 synaptic architecture that alter local cortical network connectivity that are due to direct effects  
487 of PCBs on the brain.

488

489 Figure 1.

490 Experimental design and summary timeline of PCB treatment

491 Rows indicate significant experimental timepoints: beginning of dosing (day 0), pairing with

492 male (day 28), parturition (approx. day 56), and weaning (approx. day 77).

493

494 Figure 2.

495 Comparison of ABR thresholds

496 A. Comparison of ABR thresholds in response to noise between control (blue) and PCB (red)

497 treatments. Boxplots indicate median (horizontal bar), 25<sup>th</sup> and 75<sup>th</sup> percentiles (box), range of

498 non-outlier points (vertical whiskers), and outliers (crosses). Black asterisks indicate significant

499 comparisons, \*  $p < 0.05$ , \*\*\*  $p < 0.001$ .

500 B. Comparison of thresholds to 4, 8, 16, and 32 kHz tones.

501

502 Figure 3.

503 Image of auditory cortex slice and example voltage-clamp recording

504 A. Example image of recording electrode placement in a coronal slice containing auditory

505 cortex. Recording pipette walls are highlighted in yellow lines.

506 B. Example of membrane current recorded in voltage clamp with holding potential of 10 mV

507 and bath application of 20  $\mu$ M GABA<sub>A</sub>zine.



508

509 Figure 4.

510 Comparison of spontaneous and miniature synaptic currents

511 A. Comparison of frequency of synaptic currents between control (blue) and PCB (red)

512 treatments. Boxplots indicate median (horizontal bar), 25<sup>th</sup> and 75<sup>th</sup> percentiles (box), range of

513 non-outlier points (vertical whiskers), and outliers (crosses). Black asterisks indicate significant

514 comparisons, \*  $p < 0.05$ .

515 B. Relationship of ABR threshold and sIPSC frequency for control (blue points) and PCB-exposed

516 (red points) groups. Dashed lines indicate robust linear regression fits.

517

518 Figure 5.

519 Demonstration of laser scanning photostimulation mapping of input charge

520 A. Example image demonstrating positions of stimulation grid and recording electrodes in a

521 coronal slice containing auditory cortex. Cyan points mark the sites of the 32 x 32

522 photostimulation grid. Recording pipette walls are highlighted in yellow lines. In the example,

523 current recordings were simultaneously collected from two neurons.

524 B. An example photostimulation-evoked current response from the cell positioned on the

525 bottom right. Holding potential was -65 mV. Timing of the laser pulse (1 ms duration) is

526 indicated by the red arrowhead. A pronounced negative peak begins shortly after the laser

527 onset.

528 C. Map of input charge from current responses to photostimulation at all sites of the 32 x 32  
529 stimulation grid. For recordings of excitatory responses, measured charge is inverted to positive  
530 values, and represented by color.

531

532 Figure 6.

533 Group averaged maps of photostimulation-evoked synaptic strength

534 Photostimulation-evoked input maps of charge (A), and amplitude (B) aligned to the recorded  
535 cell body. Measured charge at each site is averaged across all cells from each treatment group  
536 and is represented in color. EPSC charge maps are presented in the top plots, and IPSC charge  
537 maps are presented in the bottom plots. Black vertical scale bar marks 200  $\mu\text{m}$ .

538

539 Figure 7.

540 Comparison of photostimulation-evoked currents between treatments

541 Comparison of total excitatory (A) and inhibitory (B) input charge, input area, and input  
542 distance, between control (blue) and PCB-exposed (red) treatment groups. Boxplots indicate  
543 median (horizontal bar), 25<sup>th</sup> and 75<sup>th</sup> percentiles (box), range of non-outlier points (vertical  
544 whiskers), and outliers (crosses). Black asterisks indicate significant comparisons, \*  $p < 0.05$ .

545 C. Ratio of excitatory to inhibitory charge between control and PCB-exposed groups.

546

547 Figure 8.

548 Spatial profile of synaptic input

549 Distance profile of input charge and connection probability for control (blue) and PCB-exposed  
550 (red) treatment groups. Response measures are binned by input distance in 80  $\mu\text{m}$  bins, and  
551 interpolation between bin means are marked by the solid lines. The shaded areas indicate 1  
552 standard error bounds around the means.

553

554 References:

555 Agency for Toxic Substances and Disease Registry (2000) Toxicological profile for  
556 polychlorinated biphenyls (PCBs). US Dept Health Services, Public Health Service.

557 Atencio CA, Schreiner CE (2010) Columnar connectivity and laminar processing in cat primary  
558 auditory cortex. PLOS ONE 5:1-18

559 Balaram P, Hackett TA, Polley DB (2019) Synergistic transcriptional changes in AMPA and GABA<sub>A</sub>  
560 receptor genes support compensatory plasticity following unilateral hearing loss. Neurosci  
561 407:108-119

562 Bandara SB, Eubig PA, Sadowski RN, Schantz SL (2016) Developmental PCB exposure increases  
563 audiogenic seizures and decreases glutamic acid decarboxylase in the inferior colliculus. Toxicol  
564 Sci 149:335-345

565 Berbel P, Guadaño-Ferraz A, Martínez M, Quiles JA, Balboa R, Innocenti GM (1993) Organization  
566 of auditory callosal connections in hypothyroid rats. Eur J Neurosci 5:1465–1478.

567 Bledsoe SC, Nagase S, Miller JM, Altschuler RA (1995) Deafness-induced plasticity in the mature  
568 central auditory system. Neuroreport 7:225-229

569 Chambers AR, Resnik J, Yuan Y, Whitton JP, Edge AS, Liberman MC, Polley DB (2016) Central  
570 gain restores auditory processing following near-complete cochlear denervation. Neuron  
571 89:867-879

572 Crinnion WJ (2011) Polychlorinated biphenyls: persistent pollutants with immunological,  
573 neurological, and endocrinological consequences. Altern Med Rev 16:5-13

574 Crofton KM, Ding DL, Padich R, Taylor M, Henderson D (2000) Hearing loss following exposure  
575 during development to polychlorinated biphenyls: A cochlear site of action. Hear Res 144:196-  
576 204.

- 577 Goldey ES, Crofton KM (1998) Thyroxine replacement attenuates hypothyroxinemia, hearing  
578 loss, and motor deficits following developmental exposure to Aroclor 1254 in rats. *Toxicol Sci*  
579 45:94–105.
- 580 Goldey ES, Kehn LS, Lau C, Rehnberg GL, Crofton KM (1995) Developmental exposure to  
581 polychlorinated biphenyls (Aroclor 1254) reduces circulating thyroid hormone concentrations  
582 and causes hearing deficits in rats. *Toxicol Appl Pharmacol* 135:77–88
- 583 Grandjean P, Weihe P, Burse VW, Needham LL, Storr-Hansen E, Heinzow B, (2001)  
584 Neurobehavioral deficits associated with PCB in 7-year-old children prenatally exposed to  
585 seafood neurotoxicants. *Neurotoxicol Teratol* 23(4):305–317
- 586 Jiang X, Wang G, Lee AJ, Stornetta RL, Zhu JJ (2013) The organization of two new cortical  
587 interneuronal circuits. *Nat Neurosci* 16:210-218
- 588 Kato HK, Gillet SN, Isaacson JS (2015) Flexible sensory representations in auditory cortex driven  
589 by behavioral relevance. *Neuron* 88:1027-1039
- 590 Kenet T, Froemke RC, Schreiner CE, Pessah IN, Merzenich MM (2007) Perinatal exposure to a  
591 noncoplanar polychlorinated biphenyl alters tonotopy, receptive fields, and plasticity in rat  
592 primary auditory cortex. *Proc Nat Acad Sci* 104:7646-7651.
- 593 Kim KH, Inan SY, Berman RF, Pessah IN (2009) Excitatory and inhibitory synaptic transmission is  
594 differentially influenced by two ortho-substituted polychlorinated biphenyls in the hippocampal  
595 slice preparation. *Toxicol and App Pharmacol* 237:168-177
- 596 Kostyniak PJ, Hansen LG, Widholm JJ, Fitzpatrick RD, Olson JR, Jelferich JL, Kim KH, Sabel HJK,  
597 Seegal RF, Pessah IN, Schantz SL (2005) Formulation and characterization of an experimental  
598 PCB mixture designed to mimic human exposure from contaminated fish. *Toxicol Sci* 88:400-  
599 411
- 600 Kotak VC, Fujisawa S, Lee FA, Karthikeyan O, Aoki C, Sanes DH (2005) Hearing loss raises  
601 excitability in the auditory cortex. *J Neurosci* 25:3908-3918
- 602 Kratz MB, Manis PB (2015) Spatial organization of excitatory synaptic inputs to layer 4 neurons  
603 in mouse primary auditory cortex. *Front in Neural Circuits* 9:1-17
- 604 Lasky RE, Widholm JJ, Crofton KM, Schantz SL (2002) Perinatal exposure to Aroclor 1254 impairs  
605 distortion product otoacoustic emissions (DPOAEs) in rats. *Toxicol Sci* 68:458-464
- 606 Lein PJ, Yang D, Bachstetter AD, Tilson HA, Harry GJ, Mervis RF, Kodavanti PRS (2007)  
607 Ontogenetic alternations in molecular and structural correlates of dendritic growth after  
608 developmental exposure to polychlorinated biphenyls. *Env Health Perspect* 115:556-563
- 609 Li MC, Wu HP, Yang CY, Chen PC, Lamber GH, Guo YL (2015) Gestational exposure to  
610 polychlorinated biphenyls and dibenzofurans induced asymmetric hearing loss: Yucheng  
611 children study. *Environ Res* 137:65-71

- 612 Lomber S, Malhotra SG (2007) Sound localization during homotopic and heterotopic bilateral  
613 cooling deactivation of primary and nonprimary auditory cortical areas in the cat. *J Neurophys*  
614 97:26-43
- 615 Lucio RA, García-Velasco JV, Cerezo JR, Pacheco P, Innocenti GM, Berbel P (1997) The  
616 development of auditory callosal connections in normal and hypothyroid rats. *Cereb Cortex*  
617 7:303–306
- 618 Meng X, Kao JPY, Lee HK, Kanold PO (2017) Intracortical circuits in thalamorecipient layers of  
619 auditory cortex refine after visual deprivation. *eNeuro* 4:1-11
- 620 Min JY, Kim R, Min KB (2014) Serum polychlorinated biphenyls concentrations and hearing  
621 impairment in adults. *Chemosphere* 102:6-11.
- 622 Newman J, Aucompaugh A, Schell LM, Denham M, DeCaprio AP, Gallo MV, Ravenscroft J, Kao  
623 CC, Hanover MR, David D, Jacobs AM, Tarbell AM, Worswick P, Akwesasne Task Force on the  
624 Environment (2006) PCBs and cognitive functioning of Mohawk adolescents. *Neurotoxicol*  
625 *Teratol* 28:439-45.
- 626 Noreña AJ (2011) An integrative model of tinnitus based on a central gain controlling neural  
627 sensitivity. *Neurosci and Biobehav Rev* 35:1089-1109
- 628 Oviedo HV, Bureau I, Svoboda K, Zador AM (2010) The functional asymmetry of auditory cortex  
629 is reflected in the organization of local cortical circuits. *Nat Neurosci* 13:1413-1420
- 630 Paxinos G, Franklin KBJ (2004) *The mouse brain in stereotaxic coordinates*. San Diego: Gulf  
631 Professional
- 632 Poon E, Bandara SB, Allen JB, Sadowski RN, Schantz SL (2015) Developmental PCB exposure  
633 increases susceptibility to audiogenic seizures in adulthood. *NeuroTox* 46:117-124.
- 634 Poon E, Powers BE, McAlonan RM, Ferguson DC, Schantz SL (2011) Effects of developmental  
635 exposure to polychlorinated biphenyls and/or polybrominated diphenyl ethers on cochlear  
636 function. *Toxicol Sci* 124:161-168
- 637 Powers BE, Widholm JJ, Lasky RE, Schantz SL (2006) Auditory deficits in rats exposed to an  
638 environmental PCB mixture during development. *Toxicol Sci* 89:415-422
- 639 Ruiz Marcos A, Salas J, Sanchez-Toscano F, Escobar del Rey F, Morreale de Escobar G (1983)  
640 Effect of neonatal and adult-onset hypothyroidism on pyramidal cells of the rat auditory cortex.  
641 *Dev Brain Res* 9:205-213.
- 642 Sadowski RN, Stebbings KA, Slater BJ, Bandara SB, Llano DA, Schantz SL (2016) Developmental  
643 exposure to PCBs alters the activation of the auditory cortex in response to GABA<sub>A</sub> antagonism.  
644 *NeuroTox* 56:86-93
- 645 Sarro EC, Kotak VC, Sanes DH, Aoki C (2008) Hearing loss alters the subcellular distribution of  
646 presynaptic GAD and postsynaptic GABA<sub>A</sub> receptors in the auditory cortex. *Cereb Cortex*  
647 18:2855-2867

- 648 Schantz SL, Widholm JJ, Rice DC (2003) Effects of PCB exposure on neuropsychological function  
649 in children. *Environ Health Perspect* 111:357-376.
- 650 Slater BJ, Sons SK, Yudinsev G, Lee CM, Llano DA (2019) Thalamocortical and intracortical  
651 inputs differentiate layer-specific mouse auditory corticollular neurons. *J Neurosci* 39:256-270
- 652 Sun W, Lu J, Stolzberg D, Gray L, Deng A, Lobarinas E, Salvi RJ (2009) Salicylate increases the  
653 gain of the central auditory system. *Neurosci* 159:325-334
- 654 Threlkeld SW, Penley SC, Rosen GD, Fitch RH (2008) Detection of silent gaps in white noise  
655 following cortical deactivation in rats. *Neuroreport* 19:893-898
- 656 Trnovec T, Šovčíková E, Hust'ák M, Wimmerová S, Kočan A, Jurečková D, Langer P, Palkovičová  
657 LU, Drobná B (2008) Exposure to polychlorinated biphenyls and hearing impairment in children.  
658 *Envir Toxicol and Pharmacol* 25:183-187
- 659 Vale C, Sanes DH (2002) The effect of bilateral deafness on excitatory and inhibitory synaptic  
660 strength in the inferior colliculus. *Europ J Neuro* 16:2394-2904
- 661 Vreugdenhil HJI, Lanting CI, Mulder PGH, Boersma ER, Weisglas-Kuperus N (2002) Effects of  
662 prenatal PCB and dioxin background exposure on cognitive and motor abilities in Dutch children  
663 at school age. *J Pediatr* 140:48-56.
- 664 Vreugdenhil HJI, Van Zanten GA, Brocaar MP, Mulder PGH (2004) Prenatal exposure to  
665 polychlorinated biphenyls and breastfeeding: opposing effects on auditory P300 latencies in 9-  
666 year-old Dutch children. *Devel Med and Child Neurol* 46:398-405
- 667 Wang J, Ding D, Salvi RJ (2002) Functional reorganization in chinchilla inferior colliculus  
668 associated with chronic and acute cochlear damage. *Hear Res* 168:238-249
- 669 Winkowski DE, Kanold PO (2013) Laminar transformation of frequency organization in auditory  
670 cortex. *J Neurosci* 33:1498-1508
- 671 Yang D, Kim KH, Phimister A, Bachstetter AD, Ward TR, Stackman RW, Mervis RF, Wisniewski  
672 AB, Klein SL, Kodavanti PRS, Anderson KA, Wayman G, Pessah IN, Lein PJ (2009) Developmental  
673 exposure to polychlorinated biphenyls interferes with experience-dependent dendritic plasticity  
674 and ryanodine receptor expression in weanling rats. *Env Health Persp* 117:426-435
- 675 Yang S, Su W, Bao S (2012) Long-term, but not transient, threshold shifts alter the morphology  
676 and increase the excitability of cortical pyramidal neurons. *J Neurophysiol* 108:1567-1574
- 677 Zeng F (2013) An active loudness model suggesting tinnitus as increased central noise and  
678 hyperacusis as increased nonlinear gain. *Hear Res* 295:172-179
- 679 Znamenskiy P, Zador TM (2013) Corticostriatal neurons in auditory cortex drive decisions during  
680 auditory discrimination. *Nature* 497:482-487
- 681
- 682

683 Figure 1

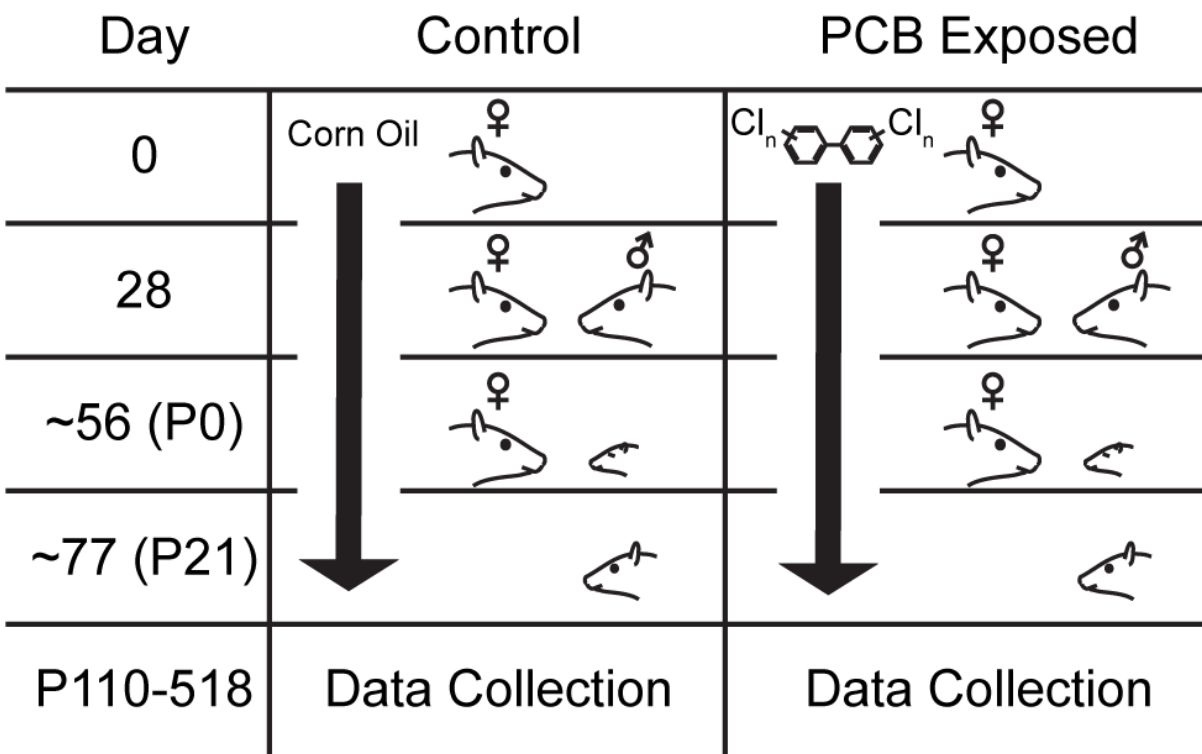

684

685 Figure 2

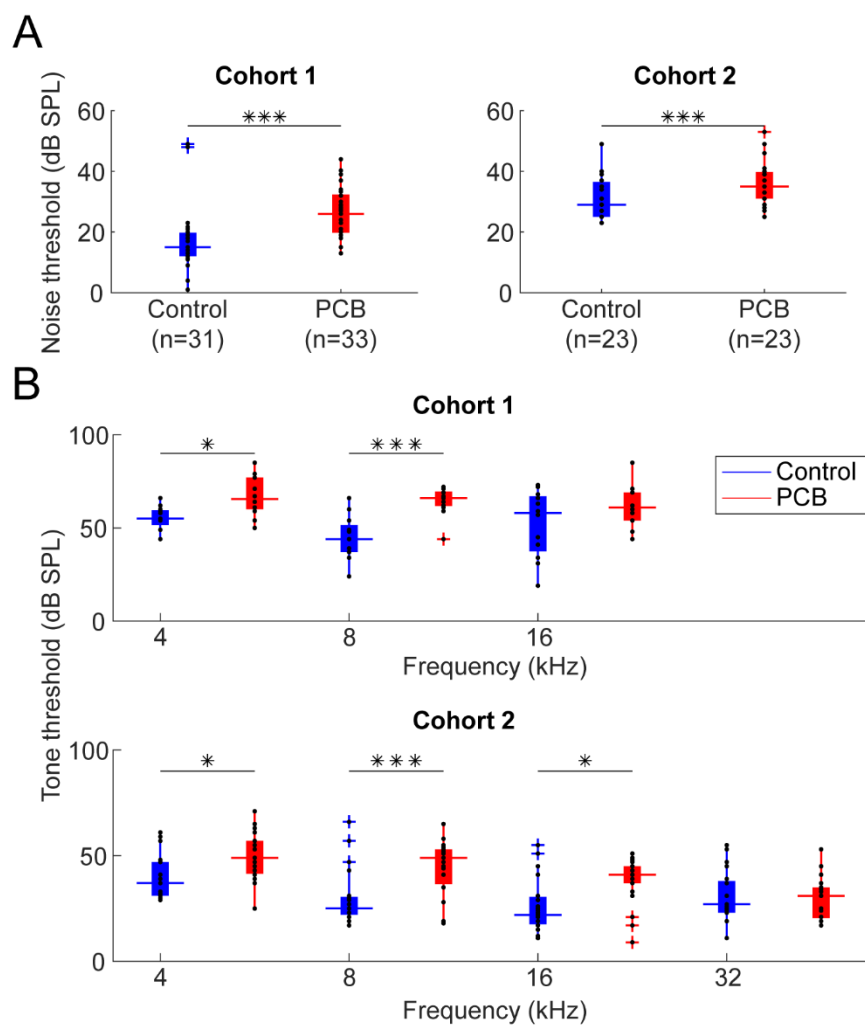



687 Figure 3

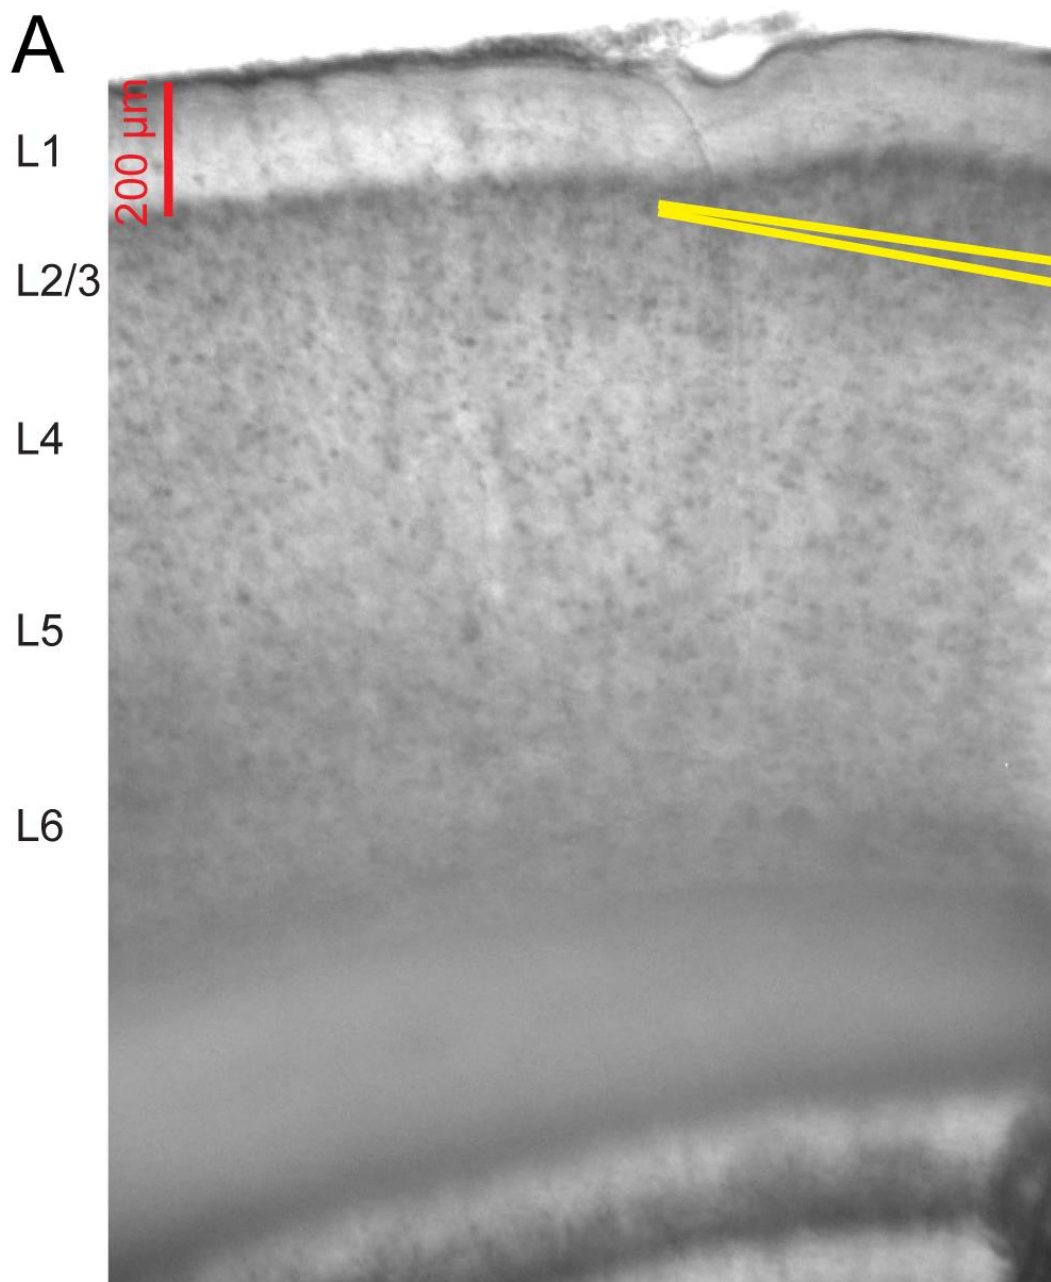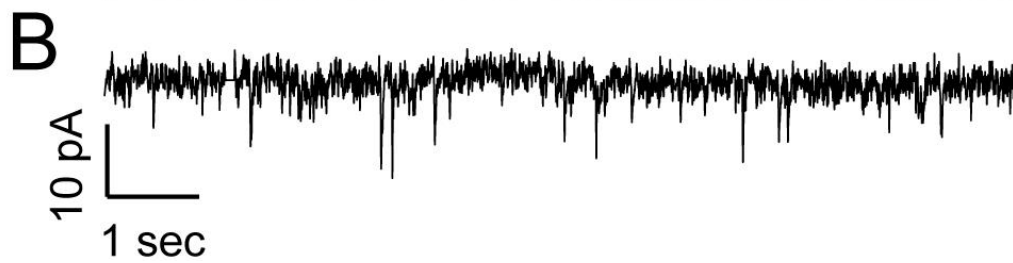

689 Figure 4

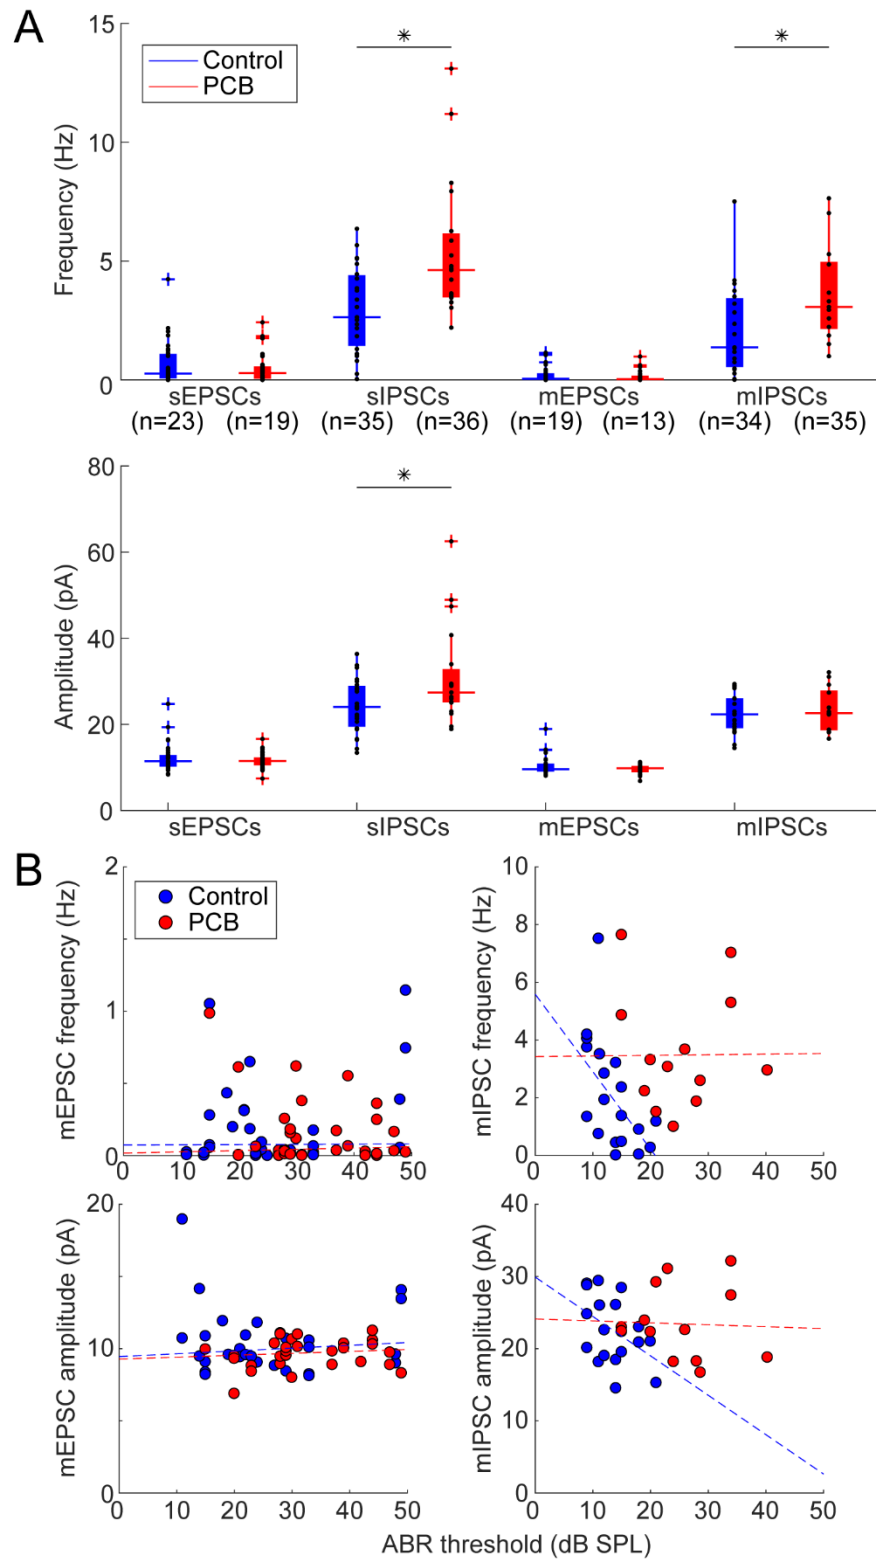

691 Figure 5

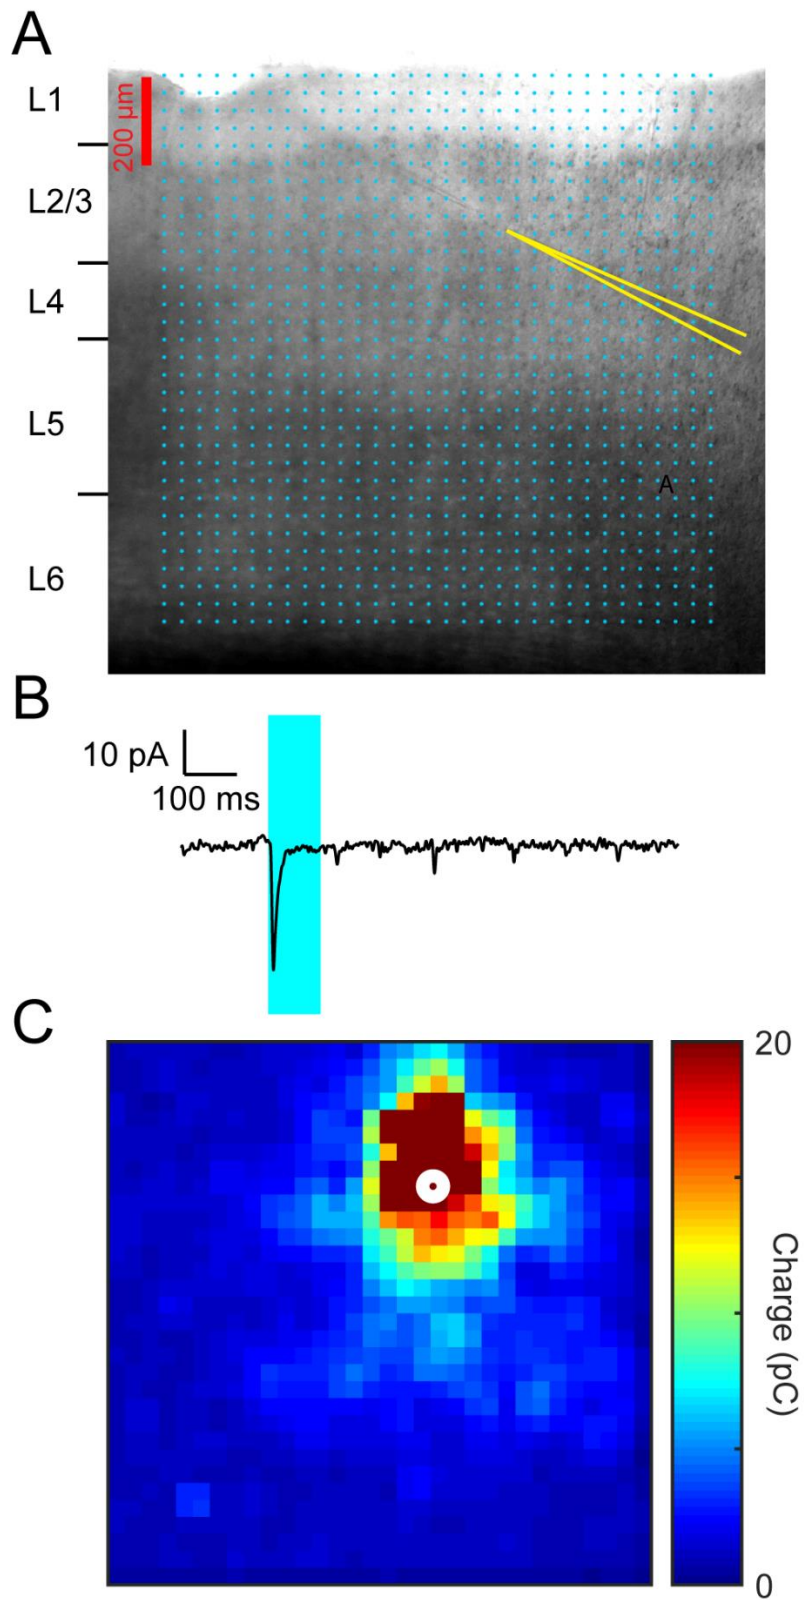

693 Figure 6

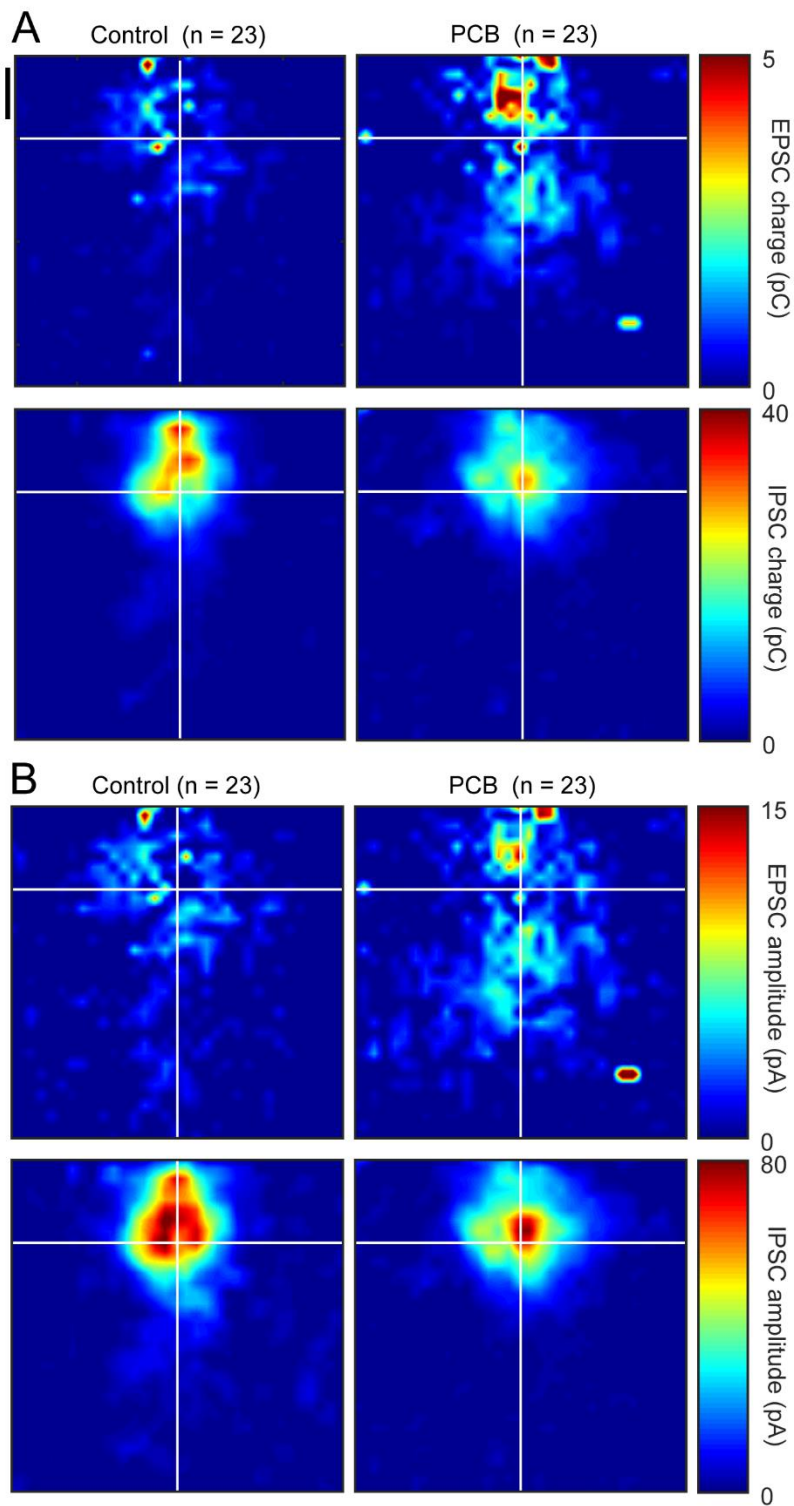

695 Figure 7

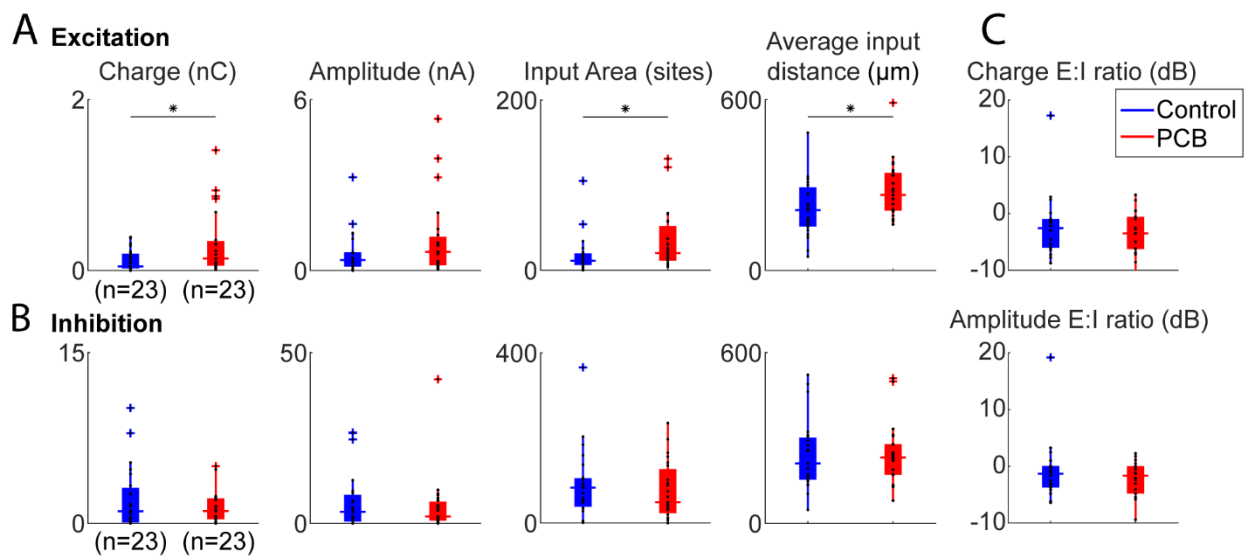

696

697 Figure 8

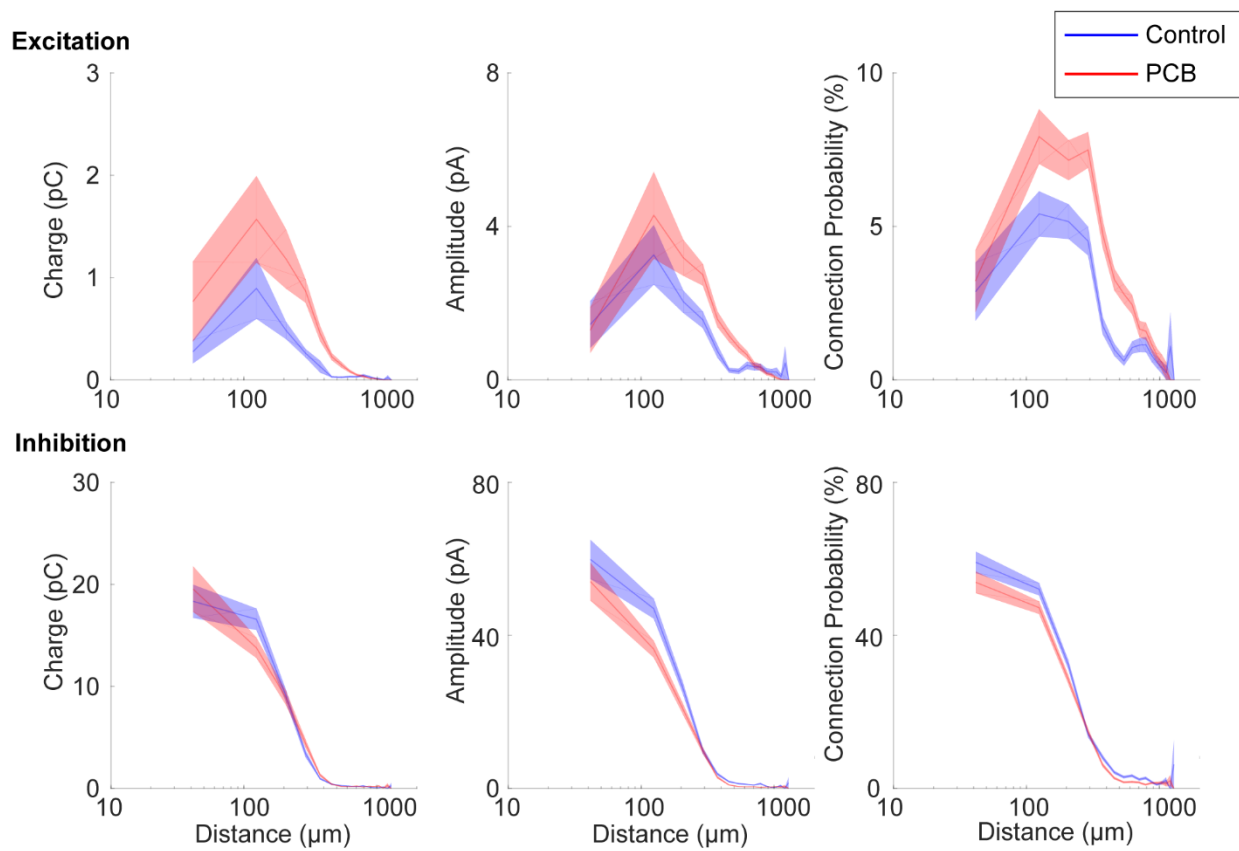

698
